# Supplementary material for: Discovery and functional assessment of a novel adipocyte population driven by intracellular Wnt/β-catenin signaling in mammals
Source: eLife journal article supplement (doi:10.7554/elife.77740), 2022-04-27
Supplement: fig4-data1 [file Fig.4-source data1.pdf › Fig.4-source data/Fig.4-source data1.pdf]

Full-sized Western blot images for Figure 4A

$\beta$ -actin

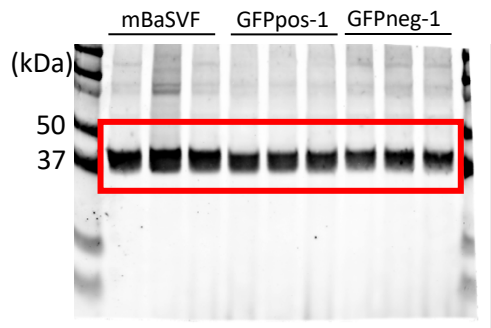

AKT

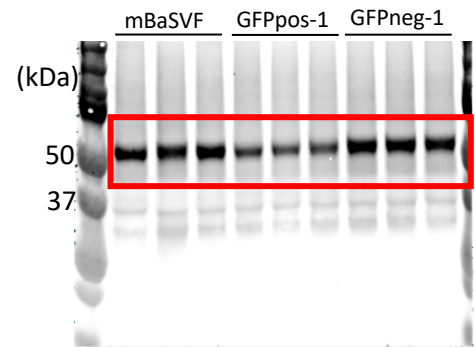

p-AKT

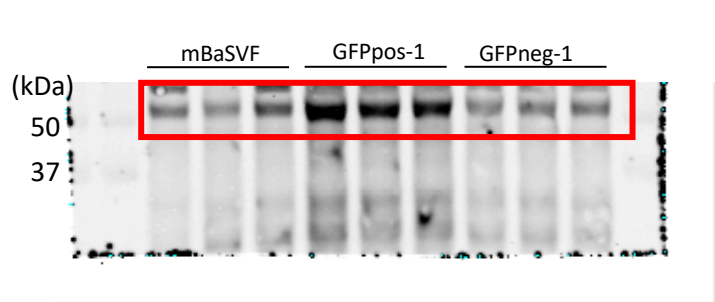

Full-sized Western blot images for Figure 4B

p-GSK-3 $\beta$

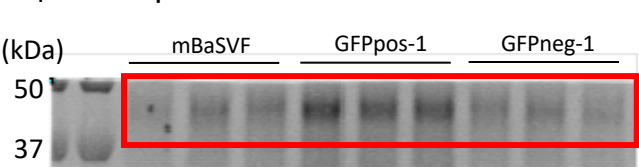

GSK-3 $\beta$

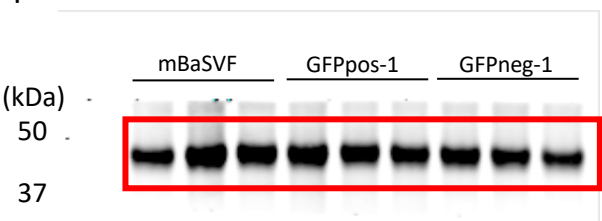

p-4E-BP1

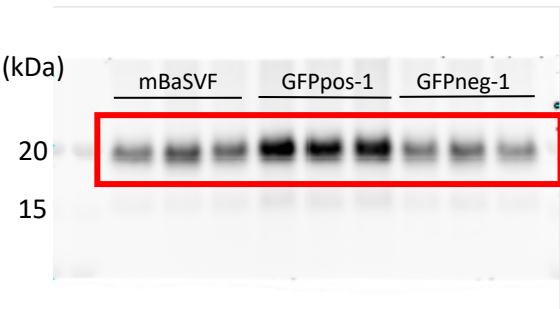

4E-BP1

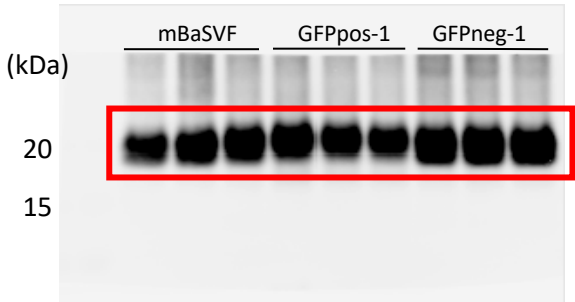

**Figure 4-source data 1.** Full-scans of Western blots. Full-sized image of Western blot from Figure 4A and 4B. Red box indicates area that was cropped and displayed in the indicated figure.
