# Supplementary material for: Discovery and functional assessment of a novel adipocyte population driven by intracellular Wnt/β-catenin signaling in mammals
Source: eLife journal article supplement (doi:10.7554/elife.77740), 2022-04-27
Supplement: fig5-data1 [file Fig.5-source data1.pdf › Fig.5-source data/Fig.5-source data1.pdf]

## Full-sized Western blot images for Figure 5H

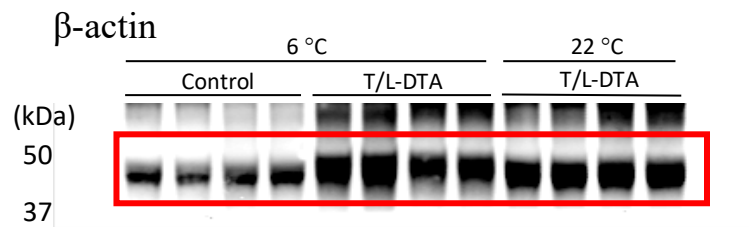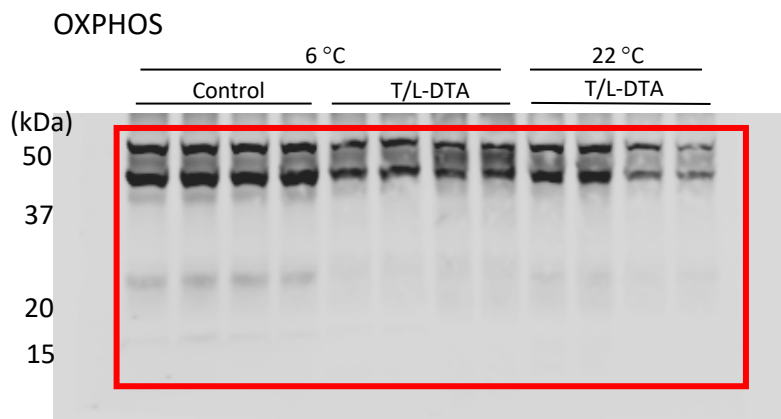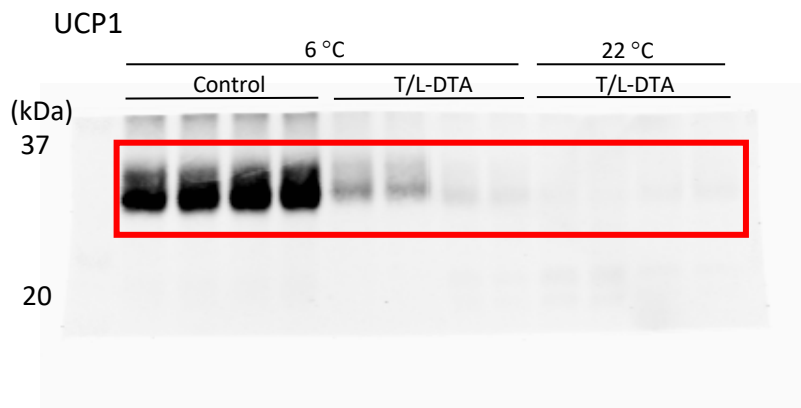

**Figure 5-source data 1.** Full-scans of Western blots. Full-sized image of Western blot from Figure 5H. Red box indicates area that was cropped and displayed in the indicated figure.
