# Supplementary material for: Discovery and functional assessment of a novel adipocyte population driven by intracellular Wnt/β-catenin signaling in mammals
Source: eLife journal article supplement (doi:10.7554/elife.77740), 2022-04-27
Supplement: fig5-figsupp3-data1 [file elife-77740-fig5-figsupp3-data1-v1.zip]

## Full-sized Western blot images for Figure 5-figure supplement 3B

$\beta$ -actin

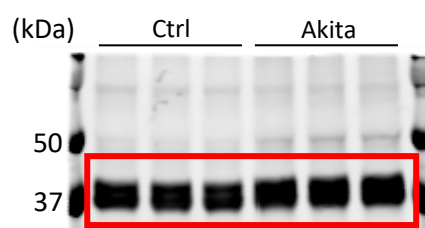

UCP1

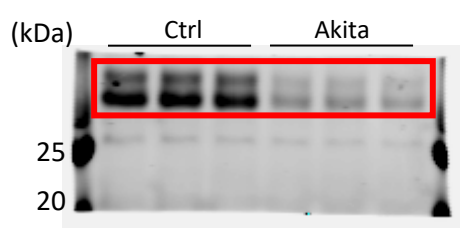

OXPHOS

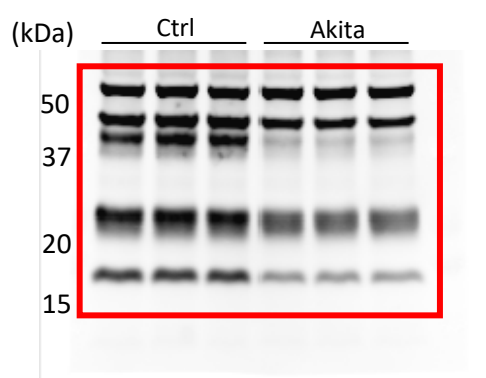

Adiponectin

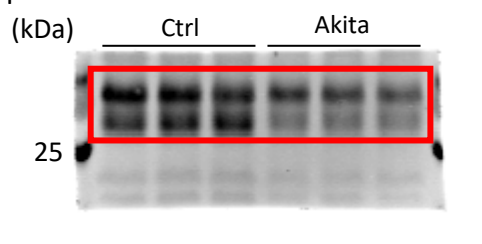

Ppar $\gamma$

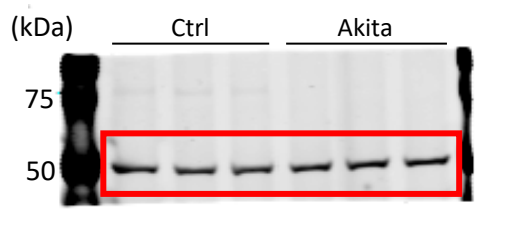

**Figure 5-figure supplement 3-source data 1.** Full-scans of Western blots. Full-sized image of Western blot from Figure 5-figure supplement 3B. Red box indicates area that was cropped and displayed in the indicated figure.
