# Supplementary material for: Discovery and functional assessment of a novel adipocyte population driven by intracellular Wnt/β-catenin signaling in mammals
Source: eLife. 2022 May 3;11:e77740. doi: 10.7554/eLife.77740 (PMC9064292; doi:10.7554/eLife.77740)
Supplement: Supplementary file 5. — Sheet 2: KEGG pathway analysis results of DEGs down-regulated in LF3-treated Wnt+ adipocytes in bulk RNA-seq. [file elife-77740-supp5.xlsx]

## Sheet: Sheet1
Down-regulated genes of LF3-treated Wnt+ adipocytes (fold change > 2, FDR < 0.05)
Gene ID	Base Mean	Log2(FC)	StdErr	Wald-Stats	P-value	P-adj
Aldoart1	1209.28	-9.45114	0.473997	-19.9392	1.85861e-88	4.53101e-87
Oaz1	119.731	-7.13027	0.636312	-11.2056	3.82686e-29	2.44557e-28
Pck1	3954.42	-6.37586	0.338247	-18.8497	2.95332e-79	6.06025e-78
Ucp1	164.482	-6.13752	0.447976	-13.7006	1.00743e-42	9.33846e-42
Car3	6705.6	-5.98568	0.305074	-19.6204	1.03533e-85	2.40218e-84
B3galt2	652.504	-5.89326	0.222819	-26.4486	3.78387e-154	2.25658e-152
Mmd2	830.186	-5.83391	0.197101	-29.5986	1.55854e-192	1.35967e-190
Cpt1b	171.431	-5.5464	0.387768	-14.3034	2.08406e-46	2.12116e-45
Anxa8	568.399	-5.54324	0.265618	-20.8692	1.02043e-96	2.76714e-95
Hist1h2ba	71.1706	-5.39422	0.546848	-9.86421	5.95033e-23	3.11002e-22
Gdf5	30.6118	-5.33743	0.710421	-7.51305	5.77669e-14	2.08642e-13
Gpr81	154.982	-5.23389	0.375898	-13.9237	4.54599e-44	4.37878e-43
Elf3	58.0623	-5.15094	0.546829	-9.41966	4.52572e-21	2.20537e-20
2610528A11Rik	129.664	-5.14229	0.394792	-13.0253	8.78538e-39	7.31332e-38
Tinag	32.1745	-5.07618	0.664436	-7.63984	2.17496e-14	8.00122e-14
Snora68	200.603	-4.91494	0.313527	-15.6763	2.19761e-55	2.76822e-54
Niacr1	201.02	-4.86906	0.309273	-15.7436	7.60451e-56	9.69908e-55
Ppp1r3c	2595.65	-4.85706	0.111313	-43.6341	0	0
2310042D19Rik	130.854	-4.84786	0.361803	-13.3992	6.11237e-41	5.42859e-40
Cpn2	20.5071	-4.82014	0.734425	-6.56315	5.26827e-11	1.66282e-10
Tectb	50.3127	-4.746	0.5478	-8.66375	4.56486e-18	1.98326e-17
Ffar4	861.612	-4.74407	0.154714	-30.6634	1.75132e-206	1.77069e-204
Plek2	31.9714	-4.73394	0.639817	-7.39889	1.37329e-13	4.87016e-13
Csl	232.127	-4.63069	0.286571	-16.1589	9.82461e-59	1.33208e-57
1300015D01Rik	135.505	-4.62542	0.335809	-13.774	3.65482e-43	3.4232e-42
Tmem45b	285.225	-4.59622	0.246667	-18.6333	1.72647e-77	3.41425e-76
Adipoq	20003.4	-4.50768	0.116531	-38.6822	0	0
Snora78	246.079	-4.49295	0.251569	-17.8597	2.42756e-71	4.25507e-70
Ism1	140.514	-4.40302	0.320007	-13.7592	4.48763e-43	4.18781e-42
Cfd	2358.61	-4.39956	0.120753	-36.4343	1.21832e-290	2.54795e-288
1810011O10Rik	139.062	-4.39046	0.312951	-14.0292	1.03297e-44	1.00963e-43
Npr3	550.615	-4.38912	0.186919	-23.4813	6.32838e-122	2.56274e-120
A530050N04Rik	62.7172	-4.37128	0.461791	-9.46593	2.90953e-21	1.43151e-20
Bves	18.9387	-4.31305	0.70315	-6.1339	8.57506e-10	2.52246e-09
2010003K11Rik	54.6817	-4.26835	0.505551	-8.44297	3.09371e-17	1.30007e-16
P2rx1	17.0695	-4.19585	0.712434	-5.88945	3.87477e-09	1.1016e-08
Rnu11	29.8089	-4.15384	0.604636	-6.86999	6.42086e-12	2.12272e-11
2410017I17Rik	12.5606	-4.13505	0.769915	-5.37079	7.83935e-08	2.07856e-07
Gstk1	16.466	-4.1238	0.712874	-5.78475	7.26189e-09	2.0365e-08
Reep1	264.313	-4.11307	0.238428	-17.2508	1.10358e-66	1.78289e-65
Snord33	12.9266	-4.09189	0.775609	-5.27571	1.32243e-07	3.45357e-07
Smarca5-ps	24.4604	-4.08755	0.630899	-6.47892	9.238e-11	2.87654e-10
Sema3g	146.338	-4.08073	0.2973	-13.726	7.09641e-43	6.59811e-42
Gm20257	106.671	-4.07021	0.343994	-11.8322	2.65995e-32	1.87833e-31
AW551984	15.7014	-4.01542	0.722522	-5.5575	2.73666e-08	7.43824e-08
Rgcc	1753.93	-3.99601	0.141223	-28.2957	3.90087e-176	2.8632e-174
Gm6194	11.5936	-3.97926	0.779598	-5.10425	3.32115e-07	8.38915e-07
Gm8909	25.0917	-3.93359	0.609905	-6.44951	1.12213e-10	3.4813e-10
Snord47	32.6914	-3.90992	0.567693	-6.88738	5.68297e-12	1.88245e-11
Lhx9	36.2715	-3.90601	0.594654	-6.56855	5.08085e-11	1.60566e-10
6030408B16Rik	201.515	-3.89761	0.247195	-15.7674	5.21845e-56	6.67253e-55
Acvr1c	4666.7	-3.89628	0.135367	-28.7832	3.48138e-182	2.73971e-180
Scarna9	120.276	-3.88227	0.302136	-12.8494	8.66581e-38	7.05605e-37
Gm13315	28.7492	-3.87529	0.647319	-5.98668	2.14168e-09	6.16461e-09
Snord12	13.1438	-3.83681	0.732108	-5.24077	1.5991e-07	4.14772e-07
Ripk4	29.9198	-3.83379	0.55885	-6.86014	6.87937e-12	2.27086e-11
Amigo3	225.595	-3.80385	0.246368	-15.4397	8.84947e-54	1.06887e-52
B230208H11Rik	83.8504	-3.79569	0.350274	-10.8363	2.3154e-27	1.39997e-26
Gm5124	17.2099	-3.79276	0.691224	-5.48703	4.08759e-08	1.10081e-07
Gm6548	875.375	-3.78819	0.148607	-25.4914	2.45549e-143	1.31537e-141
Pdk1	5641.52	-3.772	0.142196	-26.5268	4.75571e-155	2.88117e-153
Pfkfb1	1296.97	-3.76786	0.211399	-17.8235	4.64492e-71	8.11373e-70
Adrb3	70.3422	-3.76115	0.423052	-8.89051	6.08264e-19	2.72008e-18
Steap4	4240.18	-3.75225	0.121307	-30.9318	4.46039e-210	4.69633e-208
Popdc3	9.54134	-3.73919	0.790331	-4.73116	2.23237e-06	5.31944e-06
4930511E03Rik	12.8904	-3.73857	0.743918	-5.02552	5.02072e-07	1.25145e-06
Atp5k	4081.07	-3.73424	0.16898	-22.0987	3.25508e-108	1.07566e-106
Ctcfl	36.5333	-3.72233	0.493489	-7.5429	4.59638e-14	1.6688e-13
Mir1949	209.493	-3.71585	0.301112	-12.3404	5.48851e-35	4.17766e-34
H2-Q1	33.3457	-3.69527	0.516081	-7.16025	8.05277e-13	2.77709e-12
Gm9899	317.819	-3.66333	0.222234	-16.4841	4.77402e-61	6.85009e-60
Mb	32.6017	-3.66294	0.5804	-6.31106	2.7713e-10	8.40141e-10
Gm12238	15.0944	-3.66255	0.698499	-5.24345	1.57601e-07	4.09061e-07
Car2	2808.51	-3.65549	0.0915964	-39.9087	0	0
Clstn3	1835.66	-3.64793	0.165501	-22.0417	1.14702e-107	3.75786e-106
Fbxo9	1623.56	-3.64764	0.0950175	-38.3891	0	0
Nat1	14.1146	-3.63368	0.694134	-5.23483	1.65134e-07	4.27667e-07
Dnajc22	77.3813	-3.6078	0.357334	-10.0965	5.72756e-24	3.11738e-23
Liph	31.6819	-3.59346	0.545554	-6.58681	4.49363e-11	1.42303e-10
Npnt	125.933	-3.56548	0.281721	-12.6561	1.03552e-36	8.21688e-36
Armcx4	1173.59	-3.5387	0.140176	-25.2446	1.29675e-140	6.66584e-139
Fam110c	49.058	-3.53345	0.430794	-8.20218	2.36069e-16	9.49939e-16
Mir3064	13.8246	-3.53129	0.708052	-4.98733	6.12187e-07	1.51627e-06
Sctr	113.809	-3.51485	0.301727	-11.6491	2.31882e-31	1.58893e-30
Tfr2	152.432	-3.50839	0.258471	-13.5736	5.74181e-42	5.23344e-41
Fam126b	5752.03	-3.50592	0.0959266	-36.548	1.92166e-292	4.07473e-290
Scarf1	91.0455	-3.49777	0.351322	-9.95603	2.37351e-23	1.25777e-22
G0s2	18281.8	-3.4977	0.29269	-11.9502	6.47643e-33	4.65297e-32
BC030307	80.381	-3.49733	0.346781	-10.0851	6.42843e-24	3.49263e-23
Acsl1	42056.2	-3.49323	0.0637147	-54.8262	0	0
Snora74a	2028.59	-3.49194	0.122156	-28.5859	1.0048e-179	7.59416e-178
B430010I23Rik	39.9039	-3.48863	0.464175	-7.51575	5.65843e-14	2.04612e-13
Egln3	890.939	-3.48711	0.11896	-29.3132	7.03884e-189	6.00346e-187
Ccne1	2472.89	-3.45615	0.160044	-21.595	1.9993e-103	5.99673e-102
Dnajc3	20616.5	-3.44376	0.0605655	-56.8601	0	0
Nxpe5	7.89972	-3.44321	0.80521	-4.27616	1.90144e-05	4.21203e-05
Kbtbd13	7.83829	-3.4245	0.80628	-4.24729	2.16376e-05	4.77648e-05
Apln	306.999	-3.41689	0.296966	-11.506	1.2307e-30	8.22279e-30
Dhdh	294.838	-3.41431	0.21821	-15.6469	3.48832e-55	4.37243e-54
Gm11992	12.747	-3.41334	0.715358	-4.77151	1.82851e-06	4.38101e-06
Cox6b2	65.4475	-3.40268	0.368198	-9.24145	2.43176e-20	1.15118e-19
Nepn	14.2971	-3.37826	0.665209	-5.0785	3.80433e-07	9.55747e-07
Gys2	419.85	-3.37432	0.15507	-21.7599	5.56652e-105	1.73084e-103
Kcnc2	322.73	-3.37171	0.288468	-11.6883	1.46274e-31	1.0082e-30
Gpr113	34.567	-3.36252	0.508631	-6.61093	3.81914e-11	1.21624e-10
Ppp1r3d	2041.6	-3.35399	0.128323	-26.1372	1.37904e-150	7.85591e-149
Gdf10	9.5969	-3.35317	0.760464	-4.40937	1.0367e-05	2.34479e-05
4930412C18Rik	58.7441	-3.30722	0.390196	-8.4758	2.33474e-17	9.87655e-17
Wdr6	3439.33	-3.30398	0.136673	-24.1743	4.14464e-129	1.88884e-127
Rbp7	123.672	-3.30316	0.319258	-10.3464	4.34727e-25	2.44907e-24
Fgf2	38.8484	-3.29954	0.505536	-6.52681	6.71832e-11	2.10873e-10
Pfkl	10693.8	-3.29447	0.120255	-27.3957	3.08677e-165	2.02256e-163
Mir17hg	87.6884	-3.2764	0.316318	-10.3579	3.85212e-25	2.17494e-24
G6pd2	20.2011	-3.26428	0.762869	-4.27895	1.87778e-05	4.16142e-05
Dmrtc2	16.8839	-3.24971	0.660258	-4.92187	8.57192e-07	2.09959e-06
Cldn1	52.1156	-3.24451	0.42281	-7.67368	1.67131e-14	6.1977e-14
Rhbg	7.20016	-3.24123	0.815537	-3.97435	7.05704e-05	0.000148525
Snord83b	17.8965	-3.24037	0.625873	-5.17736	2.25051e-07	5.7687e-07
Snord89	6.85276	-3.23395	0.814424	-3.97085	7.16169e-05	0.000150603
Fam83a	325.749	-3.22709	0.187514	-17.2098	2.24209e-66	3.59182e-65
Kcns3	28.571	-3.21728	0.508557	-6.3263	2.51102e-10	7.62749e-10
C130074G19Rik	695.344	-3.20709	0.131134	-24.4565	4.29218e-132	2.03505e-130
Gm10474	22.9688	-3.19733	0.61444	-5.20364	1.95419e-07	5.03454e-07
Samd7	8.51969	-3.18549	0.770155	-4.13616	3.53166e-05	7.63926e-05
Nabp1	5375.05	-3.18411	0.116488	-27.3343	1.65964e-164	1.0782e-162
Gm5801	10.2743	-3.17844	0.72311	-4.39552	1.10508e-05	2.49574e-05
Prrg3	69.7016	-3.17763	0.371746	-8.54785	1.25404e-17	5.35988e-17
Klb	3285.69	-3.17748	0.162973	-19.497	1.16418e-84	2.6647e-83
Cidea	3384.66	-3.17037	0.102973	-30.7885	3.73294e-208	3.82488e-206
C130083M11Rik	112.782	-3.1688	0.325383	-9.7387	2.06181e-22	1.05736e-21
Mgll	3033.25	-3.15361	0.103772	-30.3897	7.51269e-203	7.30549e-201
Mc5r	403.865	-3.15278	0.169897	-18.557	7.16266e-77	1.39837e-75
Rdh1	19.5402	-3.15032	0.699111	-4.50618	6.60062e-06	1.5181e-05
Gm10190	8.1804	-3.14826	0.773911	-4.06798	4.74216e-05	0.000101342
Il20rb	17.642	-3.14398	0.711085	-4.42138	9.8072e-06	2.22278e-05
Wnt5a	264.26	-3.14042	0.286849	-10.948	6.7932e-28	4.18868e-27
Irf4	846.111	-3.13881	0.123381	-25.44	9.11869e-143	4.86766e-141
Otop1	146.337	-3.10734	0.245034	-12.6813	7.51232e-37	5.98594e-36
Ccnf	391.523	-3.10357	0.151462	-20.4907	2.60542e-93	6.76479e-92
Ppargc1b	1199.34	-3.10277	0.14243	-21.7846	3.25065e-105	1.01905e-103
Myo5b	327.916	-3.10208	0.202292	-15.3347	4.48249e-53	5.30497e-52
Snora7a	79.8361	-3.08877	0.414171	-7.45772	8.80322e-14	3.15564e-13
S100b	340.442	-3.08561	0.189826	-16.2549	2.06125e-59	2.85564e-58
Dio3	11.1138	-3.08539	0.741453	-4.16128	3.16471e-05	6.87866e-05
Hsd17b13	85.6527	-3.07806	0.52371	-5.87742	4.16719e-09	1.1821e-08
A530016L24Rik	546.467	-3.07738	0.191178	-16.0969	2.68037e-58	3.58643e-57
Col11a2	118.679	-3.07368	0.320186	-9.59968	8.01895e-22	4.02186e-21
Pde6a	13.9786	-3.06777	0.65447	-4.6874	2.76692e-06	6.55227e-06
Adck3	3304.21	-3.0619	0.144208	-21.2325	4.78037e-100	1.37442e-98
Mfsd2a	62.1968	-3.06016	0.363534	-8.41781	3.83582e-17	1.60267e-16
Igfbp3	112.583	-3.05933	0.271012	-11.2885	1.49527e-29	9.6853e-29
Mir677	14.3261	-3.0529	0.668418	-4.56736	4.93909e-06	1.14563e-05
Hnrnph3	82.5739	-3.04599	0.318691	-9.55781	1.20274e-21	5.99879e-21
Gm7102	7.49543	-3.03798	0.779388	-3.89791	9.70259e-05	0.000201482
Fahd2a	27.6383	-3.02467	0.513672	-5.88833	3.9011e-09	1.10847e-08
B230119M05Rik	6.41275	-3.0225	0.824516	-3.66579	0.000246577	0.000496111
Acot4	13.461	-3.00323	0.670131	-4.48156	7.40998e-06	1.69709e-05
Srsf1	6183.82	-2.99632	0.1758	-17.044	3.8764e-65	6.09485e-64
Bhlhb9	432.078	-2.9957	0.153725	-19.4875	1.40299e-84	3.20651e-83
Smtnl2	13.1632	-2.98798	0.662228	-4.51201	6.42151e-06	1.47802e-05
Kazald1	425.742	-2.98581	0.166092	-17.9768	2.96075e-72	5.27441e-71
Cdkn2c	2397.84	-2.9813	0.10971	-27.1744	1.30522e-162	8.26841e-161
Acsm3	168.67	-2.98094	0.244364	-12.1988	3.15478e-34	2.35406e-33
Csad	2843.66	-2.97482	0.117606	-25.2947	3.65257e-141	1.9032e-139
Hypk	894.816	-2.96229	0.134444	-22.0336	1.37122e-107	4.47316e-106
Gngt2	28.0846	-2.95501	0.494566	-5.97495	2.30157e-09	6.61111e-09
Snora15	24.3484	-2.95114	0.55685	-5.29971	1.1599e-07	3.03793e-07
Creld2	8022.04	-2.94813	0.0481287	-61.2552	0	0
A630076J17Rik	5.81993	-2.94497	0.826184	-3.56455	0.000364482	0.000720704
Gp1ba	45.1496	-2.94299	0.443064	-6.64236	3.08691e-11	9.86145e-11
Stc1	63.7717	-2.94192	0.387018	-7.6015	2.92721e-14	1.07067e-13
Snord17	580.446	-2.92921	0.266845	-10.9772	4.92016e-28	3.04607e-27
Dgcr8	1075.15	-2.92879	0.106013	-27.6268	5.30895e-168	3.6023e-166
Apoc1	764.598	-2.92712	0.153872	-19.023	1.09904e-80	2.34344e-79
Nat8l	842.942	-2.92331	0.306289	-9.5443	1.37035e-21	6.81246e-21
Rbp4	889.105	-2.92136	0.11379	-25.6732	2.32702e-145	1.27793e-143
Snora30	14.3171	-2.91873	0.727418	-4.01245	6.00927e-05	0.00012721
Map7d2	1003.55	-2.91668	0.150036	-19.4399	3.55009e-84	8.07739e-83
Pde3b	10462.9	-2.91482	0.0658929	-44.2357	0	0
E430016F16Rik	12.8516	-2.91296	0.67663	-4.3051	1.66914e-05	3.7136e-05
Tjp3	14.2052	-2.9117	0.631009	-4.61436	3.94314e-06	9.23596e-06
Krt36	436.787	-2.90706	0.160985	-18.058	6.82272e-73	1.22833e-71
Gk2	5.46393	-2.89928	0.827126	-3.50524	0.000456192	0.000893138
Skida1	67.3203	-2.89579	0.338896	-8.54478	1.2878e-17	5.49956e-17
Snord16a	12.7719	-2.89375	0.679616	-4.25793	2.06332e-05	4.55937e-05
Dio3os	6.98405	-2.89122	0.783088	-3.69208	0.000222429	0.000449005
Chn1	378.169	-2.89047	0.176894	-16.3402	5.11138e-60	7.19221e-59
Zfp324	589.677	-2.88932	0.256651	-11.2578	2.12039e-29	1.36706e-28
1600014C23Rik	17.3529	-2.87905	0.586609	-4.90796	9.20283e-07	2.24945e-06
Gm3219	25.9067	-2.87823	0.559804	-5.1415	2.72561e-07	6.93647e-07
Tmem50b	1300.69	-2.8725	0.0859705	-33.4127	8.97445e-245	1.23435e-242
Mblac1	34.457	-2.87149	0.472728	-6.07429	1.24537e-09	3.62705e-09
Apol6	694.861	-2.86589	0.117834	-24.3213	1.16684e-130	5.41462e-129
Mycbp	637.096	-2.86569	0.12743	-22.4883	5.40057e-112	1.89107e-110
Fabp12	13.7589	-2.86412	0.651953	-4.39313	1.11728e-05	2.52106e-05
Vil1	59.0587	-2.86272	0.39701	-7.2107	5.5666e-13	1.93412e-12
Cenpf	1419.26	-2.8539	0.133528	-21.373	2.3844e-101	6.94705e-100
Acadm	16517.8	-2.84712	0.148846	-19.128	1.47751e-81	3.19506e-80
Srp54a	22.8765	-2.84624	0.673773	-4.22434	2.39643e-05	5.26877e-05
Pnma5	5.36441	-2.84468	0.829214	-3.43057	0.000602307	0.00116457
Pbld1	171.936	-2.84463	0.301317	-9.44065	3.70485e-21	1.81405e-20
Lrrc15	10.2346	-2.8398	0.715333	-3.96989	7.19045e-05	0.000151187
Acad12	110.692	-2.83531	0.318372	-8.90567	5.30633e-19	2.3813e-18
Fam46d	10.2404	-2.83473	0.715428	-3.96228	7.42365e-05	0.000155768
Snora44	48.0619	-2.83223	0.465472	-6.08464	1.16751e-09	3.40809e-09
Hook1	292.916	-2.83055	0.215368	-13.1428	1.8709e-39	1.58949e-38
D3Ertd751e	692.328	-2.81766	0.11127	-25.3227	1.79454e-141	9.41485e-140
Ccne2	1976.88	-2.81631	0.105383	-26.7246	2.43839e-157	1.50716e-155
Zfp810	120.593	-2.81289	0.264305	-10.6426	1.88847e-26	1.10932e-25
Ak4	823.997	-2.81091	0.106166	-26.4767	1.80023e-154	1.08633e-152
Luc7l3	1234.5	-2.80293	0.089177	-31.4311	7.61062e-217	8.54348e-215
4931408D14Rik	75.8661	-2.79516	0.312454	-8.94582	3.69193e-19	1.66513e-18
2810417H13Rik	1468.62	-2.79191	0.120887	-23.0951	5.18258e-118	1.98302e-116
Irs3	59.5686	-2.78646	0.431942	-6.451	1.11113e-10	3.44789e-10
Epn3	24.8426	-2.77576	0.56073	-4.95026	7.41156e-07	1.82445e-06
Dnajb11	10021.6	-2.77517	0.0570614	-48.6348	0	0
Nucb2	1922.03	-2.77022	0.0811295	-34.1456	1.5523e-255	2.3699e-253
Ndufa1	2941.97	-2.76675	0.170296	-16.2467	2.35744e-59	3.26301e-58
Hsp90b1	117532	-2.76429	0.039492	-69.9961	0	0
Abcd2	274.933	-2.76185	0.171875	-16.0689	4.21582e-58	5.60653e-57
Slc27a3	73.5153	-2.75822	0.333862	-8.26156	1.43783e-16	5.84744e-16
Cbr4	711.913	-2.75584	0.28578	-9.64323	5.25111e-22	2.65108e-21
Fgl1	23.7305	-2.75455	0.527776	-5.21917	1.79723e-07	4.64034e-07
Acat2	4481.15	-2.75162	0.0910621	-30.2169	1.42057e-200	1.33876e-198
Cntfr	99.2453	-2.75024	0.603289	-4.55873	5.14631e-06	1.19242e-05
Fam73b	4391.53	-2.74786	0.117865	-23.3135	3.23125e-120	1.27802e-118
Gnmt	64.6577	-2.7425	0.381441	-7.18986	6.48583e-13	2.24533e-12
Aifm1	5133.93	-2.742	0.144718	-18.9472	4.65411e-80	9.77363e-79
Snord104	37.697	-2.73357	0.451992	-6.04782	1.46818e-09	4.26298e-09
Sfrp1	38.0831	-2.72891	0.426181	-6.40318	1.5217e-10	4.68289e-10
Pmepa1	1011.17	-2.7121	0.136011	-19.9404	1.81722e-88	4.43896e-87
Higd1a	1957.34	-2.71064	0.171456	-15.8095	2.67551e-56	3.44119e-55
Prelp	772.384	-2.70826	0.14497	-18.6815	7.00133e-78	1.39907e-76
A630023A22Rik	4.85315	-2.70701	0.833028	-3.2496	0.00115567	0.00216938
Snora31	18.9424	-2.7041	0.636273	-4.2499	2.13863e-05	4.72237e-05
Zkscan7	87.1041	-2.70167	0.32616	-8.28329	1.19817e-16	4.89495e-16
Arhgef33	12.6819	-2.6989	0.681758	-3.95874	7.53469e-05	0.000157924
Cd83	25.9086	-2.697	0.556239	-4.84864	1.24312e-06	3.0168e-06
Gramd1c	23.8681	-2.69399	0.529993	-5.08306	3.71395e-07	9.34242e-07
Lfng	76.4015	-2.69074	0.324941	-8.2807	1.2245e-16	4.99987e-16
Fabp4	362476	-2.68872	0.0889506	-30.2272	1.04135e-200	9.87471e-199
Snora62	35.2255	-2.68726	0.469889	-5.71891	1.07206e-08	2.98236e-08
Snord15b	407.541	-2.68692	0.216524	-12.4093	2.32627e-35	1.79551e-34
Marco	11.7362	-2.6844	0.709219	-3.785	0.000153706	0.000315154
Glra3	4.76975	-2.68376	0.833576	-3.21958	0.0012838	0.00239782
Eif2ak2	912.488	-2.68007	0.16015	-16.7347	7.31723e-63	1.09845e-61
Oraov1	295.995	-2.67194	0.188997	-14.1375	2.23192e-45	2.21743e-44
Stox2	194.426	-2.67107	0.565578	-4.72272	2.3271e-06	5.53737e-06
Dbi	23276.3	-2.67051	0.0967282	-27.6084	8.83019e-168	5.93879e-166
Slc24a5	28.9071	-2.66548	0.536996	-4.96369	6.91669e-07	1.70676e-06
Xirp2	8.54915	-2.66404	0.770003	-3.45978	0.000540621	0.00105043
Dkk2	5.1752	-2.66145	0.835265	-3.18635	0.00144079	0.002675
Gpam	6232.78	-2.656	0.111435	-23.8346	1.46143e-125	6.30273e-124
E2f2	368.707	-2.65105	0.176034	-15.0599	2.97452e-51	3.3991e-50
Mgarp	17.425	-2.6485	0.624643	-4.24002	2.23504e-05	4.926e-05
B430212C06Rik	50.2796	-2.64606	0.395057	-6.69793	2.11387e-11	6.80422e-11
Sdpr	25179	-2.64525	0.0669425	-39.5152	0	0
Wfdc12	45.191	-2.64228	0.410794	-6.43212	1.25838e-10	3.89531e-10
Svep1	2460.74	-2.64179	0.143248	-18.4421	6.03566e-76	1.162e-74
Lhx1	9.46293	-2.64162	0.727329	-3.63195	0.000281284	0.000562311
Cacna2d4	7.47055	-2.63373	0.760182	-3.46461	0.000531009	0.00103273
AW112010	128.315	-2.63048	0.240518	-10.9367	7.69171e-28	4.72363e-27
Mir1983	5.63022	-2.63047	0.799108	-3.29176	0.000995626	0.00188238
Acoxl	19.7761	-2.62969	0.554385	-4.74343	2.10127e-06	5.01644e-06
Thrsp	4264.68	-2.62902	0.18363	-14.317	1.71465e-46	1.74867e-45
Mpo	9.47683	-2.62651	0.744602	-3.5274	0.000419667	0.000824378
Gpihbp1	6.23288	-2.62332	0.808343	-3.24531	0.00117324	0.0022002
4930465K10Rik	4.46428	-2.62095	0.834749	-3.1398	0.00169062	0.00310973
Slc26a2	815.654	-2.62011	0.131405	-19.9392	1.86084e-88	4.53101e-87
Tshr	206.904	-2.60908	0.202417	-12.8896	5.14978e-38	4.2247e-37
Ccdc89	8.81445	-2.60845	0.732759	-3.55977	0.00037118	0.000733567
4933406I18Rik	71.8566	-2.60712	0.370214	-7.04219	1.89238e-12	6.41594e-12
Ehhadh	1763.28	-2.59459	0.24088	-10.7713	4.7031e-27	2.81137e-26
Slco1a1	10.8802	-2.58548	0.761433	-3.39555	0.000684905	0.00131577
2610019E17Rik	80.457	-2.58485	0.293832	-8.79704	1.40476e-18	6.20201e-18
Cflar	4130.76	-2.58453	0.0679555	-38.0327	0	0
Topaz1	4.38288	-2.57938	0.835774	-3.08622	0.00202718	0.00369055
Snora70	45.0509	-2.57748	0.429707	-5.99823	1.99476e-09	5.74821e-09
Elovl3	10150.6	-2.57579	0.0685253	-37.5889	0	0
Adora1	2797.83	-2.56451	0.0768957	-33.3505	7.17259e-244	9.77713e-242
Snord22	362.165	-2.56413	0.662951	-3.86775	0.000109843	0.000227232
Pdzd2	498.424	-2.56359	0.145379	-17.6338	1.35511e-69	2.29363e-68
2900060B14Rik	21.9411	-2.56146	0.559989	-4.57413	4.78194e-06	1.11019e-05
Etfdh	12697	-2.5587	0.057811	-44.2597	0	0
Sdf2l1	7860.51	-2.55236	0.0516777	-49.39	0	0
Taf2	1610.84	-2.55011	0.217376	-11.7313	8.80831e-32	6.11534e-31
D930016D06Rik	173.068	-2.54815	0.226443	-11.2529	2.24078e-29	1.44346e-28
Fasn	25139.3	-2.54688	0.111707	-22.7997	4.61418e-115	1.68932e-113
2500004C02Rik	33.1959	-2.54567	0.440835	-5.77466	7.71075e-09	2.16e-08
Gm6578	10.9972	-2.54329	0.714019	-3.56194	0.000368129	0.000727725
Iba57	560.235	-2.52973	0.115733	-21.8583	6.4838e-106	2.06225e-104
Pnpla5	11.1701	-2.52768	0.678353	-3.72619	0.000194393	0.000394654
Noxred1	5.34625	-2.5275	0.806098	-3.13548	0.00171576	0.00315368
Ppib	2032.26	-2.52621	0.119199	-21.1933	1.10065e-99	3.12918e-98
1110019D14Rik	51.8141	-2.52171	0.363013	-6.94662	3.7415e-12	1.25047e-11
Nr1i3	5.43423	-2.52128	0.811137	-3.10833	0.00188146	0.00344085
Apex1	405.158	-2.52095	0.139169	-18.1144	2.45457e-73	4.46117e-72
Pik3r1	9381.12	-2.52015	0.136961	-18.4005	1.30139e-75	2.48355e-74
Pla2g4b	73.0372	-2.51793	0.440193	-5.72007	1.06481e-08	2.96271e-08
Klhl23	427.812	-2.51733	0.230976	-10.8987	1.16962e-27	7.13692e-27
Myb	9.56653	-2.51627	0.687126	-3.66202	0.000250239	0.000503147
Sfrs18	805.216	-2.51476	0.139242	-18.0603	6.54247e-73	1.18066e-71
Angptl1	5.33521	-2.50907	0.803792	-3.12154	0.00179907	0.00329808
Fabp9	6.56024	-2.50742	0.770029	-3.25627	0.00112886	0.00212115
Sycp2	82.2353	-2.50587	0.356927	-7.02068	2.20797e-12	7.45612e-12
Sh3pxd2a	8041.11	-2.50583	0.0652133	-38.4252	0	0
9230114K14Rik	134.066	-2.50445	0.350492	-7.14555	8.9638e-13	3.08222e-12
C77370	167.913	-2.50274	0.247824	-10.0989	5.58868e-24	3.04288e-23
Acot10	20.8857	-2.50151	0.667666	-3.74666	0.000179208	0.000364942
Lat	5.66076	-2.4986	0.816437	-3.06037	0.00221062	0.00400398
Krt79	207.615	-2.49602	0.207951	-12.003	3.42804e-33	2.48155e-32
Gm10767	27.5778	-2.49549	0.500582	-4.98517	6.1908e-07	1.53259e-06
Pcyox1	6621.84	-2.48978	0.137631	-18.0903	3.80129e-73	6.88426e-72
1700061G19Rik	5.06628	-2.48318	0.806898	-3.07744	0.00208788	0.00379381
Hsf5	5.43657	-2.48141	0.807915	-3.07138	0.00213075	0.00386436
Acss3	2761.99	-2.47978	0.178498	-13.8925	7.03251e-44	6.73137e-43
Kctd14	20.2838	-2.47602	0.70193	-3.52744	0.000419596	0.000824342
Snn	1235.65	-2.47526	0.0912252	-27.1335	3.9681e-162	2.49305e-160
Igf1	97.222	-2.47364	0.316684	-7.81107	5.6704e-15	2.1476e-14
Tex40	11.2823	-2.47182	0.676131	-3.65583	0.000256349	0.00051462
Sec14l4	17.5644	-2.46635	0.547355	-4.50595	6.6078e-06	1.5193e-05
Ephb2	115.337	-2.46389	0.369255	-6.67259	2.51323e-11	8.05742e-11
Arxes2	11022.2	-2.46275	0.0578164	-42.5961	0	0
Adamts15	622.83	-2.46253	0.161544	-15.2437	1.81361e-52	2.12498e-51
Rasl12	38.3253	-2.45983	0.474969	-5.17892	2.23173e-07	5.72444e-07
Arhgef37	236.591	-2.45841	0.177032	-13.8868	7.6191e-44	7.28827e-43
Gprc5c	314.258	-2.45681	0.209321	-11.7371	8.22879e-32	5.73125e-31
Snrpf	42.3884	-2.45465	0.422258	-5.81315	6.13064e-09	1.72592e-08
Slc33a1	2296.07	-2.45375	0.129126	-19.0028	1.6183e-80	3.43625e-79
Srsf2	4245.16	-2.45085	0.0693446	-35.3431	1.28094e-273	2.17291e-271
Sap18	442.129	-2.45082	0.150928	-16.2384	2.70059e-59	3.73121e-58
Ormdl2	599.508	-2.44266	0.152794	-15.9866	1.58442e-57	2.07633e-56
Ubd	211.901	-2.43969	0.226398	-10.7761	4.46394e-27	2.67049e-26
Ffar2	879.904	-2.43857	0.103338	-23.5978	4.05516e-123	1.66874e-121
Prrg1	1648.09	-2.42716	0.103116	-23.538	1.66498e-122	6.8148e-121
Srrt	1805.33	-2.4271	0.116855	-20.7702	8.05936e-96	2.15109e-94
Fam162a	3910.27	-2.42644	0.157383	-15.4174	1.25002e-53	1.50387e-52
Rps27	20.1072	-2.42576	0.546123	-4.44179	8.92145e-06	2.02865e-05
Snord35a	10.3826	-2.42059	0.672843	-3.59755	0.000321225	0.000638145
Snora21	24.1952	-2.4176	0.488484	-4.94918	7.45252e-07	1.83364e-06
Hmgn5	418.834	-2.41359	0.183982	-13.1186	2.57648e-39	2.17682e-38
Hnrnpm	2735.96	-2.41354	0.143519	-16.8169	1.83663e-63	2.79632e-62
Lpar6	164.615	-2.41208	0.278104	-8.67328	4.19839e-18	1.82664e-17
Gimap6	52.1881	-2.40964	0.418094	-5.7634	8.24377e-09	2.30466e-08
Acat1	19652	-2.40585	0.110706	-21.7319	1.02503e-104	3.16784e-103
Hexim2	254.674	-2.40561	0.174153	-13.8132	2.12233e-43	2.00258e-42
Fbxo33	434.1	-2.40496	0.172545	-13.9381	3.71542e-44	3.58781e-43
Polq	419.18	-2.40431	0.136263	-17.6446	1.11927e-69	1.90077e-68
Echdc1	4815.47	-2.4041	0.0994315	-24.1785	3.7468e-129	1.71264e-127
Papolb	14.3112	-2.4021	0.60976	-3.93941	8.16818e-05	0.00017064
Gm5627	149.82	-2.40191	0.246395	-9.74818	1.878e-22	9.6407e-22
H2-T22	5.87727	-2.40149	0.771194	-3.11399	0.00184578	0.00337883
Ndufb10	7840.39	-2.39768	0.173747	-13.7998	2.55588e-43	2.40423e-42
Fsbp	24.7703	-2.39697	0.510006	-4.69989	2.60299e-06	6.16983e-06
Trp53inp1	9480.42	-2.39691	0.0694233	-34.5261	3.26067e-261	5.02835e-259
Hcls1	189.604	-2.39247	0.245182	-9.75794	1.7058e-22	8.78329e-22
1700012D01Rik	18.9202	-2.39217	0.586684	-4.07745	4.55331e-05	9.74834e-05
4833418N02Rik	27.7312	-2.38769	0.469315	-5.08761	3.62604e-07	9.12608e-07
Plcb1	1272.15	-2.38504	0.11936	-19.9819	7.91158e-89	1.94502e-87
Vaultrc5	20.8495	-2.38426	0.51364	-4.6419	3.45227e-06	8.11984e-06
Pnpla3	664.349	-2.38147	0.102939	-23.1348	2.06711e-118	7.98949e-117
1700023L04Rik	49.0868	-2.38016	0.490655	-4.85097	1.22857e-06	2.98197e-06
Gjb2	46.507	-2.37455	0.364789	-6.50937	7.54668e-11	2.36484e-10
1700086O06Rik	144.079	-2.37386	0.233783	-10.1541	3.17735e-24	1.74116e-23
Bet1	2948.01	-2.37305	0.10048	-23.617	2.57527e-123	1.06549e-121
Eps8l2	47.0648	-2.37139	0.407285	-5.82243	5.79979e-09	1.63458e-08
Esrp2	62.3325	-2.37073	0.369636	-6.4137	1.42034e-10	4.38156e-10
Lyrm5	2868.43	-2.37061	0.120776	-19.6282	8.87842e-86	2.06312e-84
D5Ertd579e	4009.37	-2.36865	0.10509	-22.5392	1.71329e-112	6.08298e-111
Pxmp2	338.873	-2.3674	0.242662	-9.75595	1.73969e-22	8.95479e-22
Krt28	4.89657	-2.36424	0.816562	-2.89535	0.0037873	0.00665984
Ager	22.153	-2.36387	0.534387	-4.42351	9.7109e-06	2.20259e-05
Slc7a10	17.2221	-2.36386	0.627282	-3.76842	0.000164287	0.000335946
Snord65	6.29069	-2.36309	0.793094	-2.97959	0.00288638	0.00514974
Mir22hg	490.985	-2.36295	0.251936	-9.37918	6.6488e-21	3.21226e-20
4933406C10Rik	87.9194	-2.36201	0.338812	-6.97143	3.13741e-12	1.05249e-11
Cidec	52408	-2.36086	0.0698113	-33.8177	1.0844e-250	1.54725e-248
Atp6v1c2	8.86418	-2.35864	0.713465	-3.3059	0.000946725	0.00179367
G630090E17Rik	71.8207	-2.35646	0.304251	-7.74513	9.54808e-15	3.57631e-14
Snora23	78.4897	-2.35285	0.380282	-6.18712	6.1274e-10	1.82069e-09
2310068J16Rik	23.4738	-2.35281	0.531979	-4.42275	9.74513e-06	2.20937e-05
Fmo4	10.6207	-2.35192	0.721652	-3.25908	0.00111774	0.00210181
Cox8b	116.699	-2.34968	0.393563	-5.97027	2.36861e-09	6.79345e-09
Sdr42e1	163.657	-2.34896	0.21678	-10.8356	2.33315e-27	1.41015e-26
Gm5475	3.73201	-2.3489	0.839077	-2.79938	0.00512003	0.00884548
Pdia6	18934.5	-2.3487	0.03471	-67.6663	0	0
Pdia4	25139.6	-2.34737	0.0454814	-51.6117	0	0
Kbtbd8	207.838	-2.34604	0.223572	-10.4934	9.2604e-26	5.31498e-25
Hnrnph1	3180.13	-2.34548	0.0600869	-39.0347	0	0
Mdh1	35141.7	-2.34547	0.035898	-65.3369	0	0
Idh1	15511.4	-2.34351	0.133025	-17.6171	1.82241e-69	3.07433e-68
Cdhr5	3.61789	-2.34349	0.83902	-2.79313	0.00522008	0.00900813
A630066F11Rik	65.6255	-2.34132	0.334199	-7.00577	2.45635e-12	8.27109e-12
Lgals12	1799.14	-2.34113	0.0763792	-30.6514	2.53399e-206	2.54516e-204
L3hypdh	201.154	-2.33935	0.265034	-8.82659	1.07916e-18	4.77692e-18
Pou4f1	16.5434	-2.33535	0.675513	-3.45714	0.000545935	0.00106014
Hist1h2bh	429.361	-2.33093	0.174004	-13.3958	6.39473e-41	5.67607e-40
Lmcd1	204.645	-2.3302	0.184617	-12.6218	1.60081e-36	1.26368e-35
Bnip3	10601.5	-2.3275	0.0645815	-36.0398	1.99277e-284	3.8511e-282
Upf3b	438.07	-2.32564	0.134958	-17.2323	1.51899e-66	2.44624e-65
Mvd	1750.19	-2.32549	0.133843	-17.3748	1.28133e-67	2.10119e-66
Prss16	43.6754	-2.32482	0.371362	-6.26026	3.84339e-10	1.15461e-09
Gpd1	23816.7	-2.32462	0.0959074	-24.2381	8.8176e-130	4.06702e-128
A430033K04Rik	185.289	-2.32459	0.217469	-10.6893	1.14236e-26	6.74678e-26
Ankef1	233.442	-2.32424	0.175811	-13.2201	6.71661e-40	5.7803e-39
Snord34	29.4939	-2.32378	0.494682	-4.69751	2.63352e-06	6.24121e-06
Apon	12.3712	-2.32366	0.656457	-3.5397	0.000400581	0.000788713
P2ry1	3.50762	-2.32123	0.839144	-2.76619	0.00567161	0.00974218
Fam3c	1918.33	-2.31732	0.144659	-16.0192	9.39067e-58	1.23486e-56
Slc17a1	11.0512	-2.31653	0.675002	-3.43189	0.000599389	0.00115922
Cox6c	7799.26	-2.31482	0.0525351	-44.0624	0	0
Tes	521.715	-2.31195	0.217845	-10.6128	2.5973e-26	1.51521e-25
Ndufa4l2	106.624	-2.31156	0.264947	-8.72462	2.67085e-18	1.16903e-17
4932441J04Rik	8.70473	-2.31022	0.734229	-3.14645	0.00165265	0.00304427
1600020E01Rik	114.851	-2.30907	0.251824	-9.16937	4.75779e-20	2.22813e-19
Clspn	938.996	-2.3069	0.110578	-20.8623	1.17966e-96	3.19324e-95
N4bp2	1087.43	-2.30417	0.0960224	-23.9962	3.04617e-127	1.348e-125
Zfp599	43.1789	-2.30259	0.370492	-6.21495	5.13395e-10	1.53446e-09
Nrep	34.2305	-2.30212	0.425927	-5.40497	6.48194e-08	1.72795e-07
Fbxo40	9.86158	-2.30167	0.71758	-3.20755	0.00133872	0.0024952
Cacnb4	180.959	-2.30056	0.187955	-12.2399	1.9028e-34	1.42822e-33
6720456H20Rik	603.786	-2.30011	0.162632	-14.143	2.06195e-45	2.0508e-44
Hp	1160.93	-2.29955	0.202688	-11.3453	7.82843e-30	5.12287e-29
Arglu1	852.113	-2.29946	0.136519	-16.8435	1.17197e-63	1.79104e-62
Tuba3a	4.12809	-2.29914	0.839578	-2.73845	0.00617293	0.0105582
Nipsnap1	531.647	-2.29906	0.122628	-18.7482	2.00251e-78	4.03861e-77
Pigr	65.03	-2.29762	0.327652	-7.01238	2.34293e-12	7.89787e-12
Pstpip2	95.2098	-2.29745	0.270238	-8.50157	1.87036e-17	7.93628e-17
Slc17a9	43.9153	-2.29654	0.397204	-5.78177	7.39207e-09	2.07225e-08
Rin2	1552.11	-2.29563	0.0731628	-31.377	4.17375e-216	4.61744e-214
Chst13	3.53496	-2.2936	0.839402	-2.73242	0.00628704	0.0107413
Snord2	18.4534	-2.29314	0.528026	-4.34285	1.40646e-05	3.148e-05
F13a1	16.1908	-2.29274	0.655659	-3.49685	0.000470794	0.000920898
Col27a1	69.7728	-2.28915	0.319335	-7.16849	7.58304e-13	2.61628e-12
Ldha	43598.7	-2.28801	0.103844	-22.0333	1.38276e-107	4.50118e-106
Slc16a3	240.939	-2.28783	0.184861	-12.376	3.52695e-35	2.70855e-34
Ift20	795.669	-2.28498	0.183477	-12.4538	1.33418e-35	1.03554e-34
Smim4	281.432	-2.28238	0.317862	-7.1804	6.95077e-13	2.40248e-12
Sucla2	9964.79	-2.28167	0.056175	-40.6172	0	0
Rps6kl1	29.087	-2.27981	0.500771	-4.55259	5.29895e-06	1.22612e-05
Krt14	4.51382	-2.27671	0.82185	-2.77022	0.00560178	0.00963198
Mfsd7b	694.097	-2.27153	0.13729	-16.5455	1.72642e-61	2.51021e-60
Tmem74b	21.0502	-2.2713	0.529663	-4.2882	1.80126e-05	3.99997e-05
Hnrnpa1	23.122	-2.26618	0.596289	-3.80047	0.000144421	0.000296712
Arsi	3.60377	-2.26393	0.839566	-2.69655	0.00700625	0.0119044
AI507597	24.0735	-2.26082	0.554327	-4.07848	4.53302e-05	9.70641e-05
Sfpq	2957.27	-2.2598	0.109348	-20.6661	6.98817e-95	1.83946e-93
Sult6b1	4.4584	-2.2594	0.819544	-2.7569	0.00583518	0.010013
Rrm2	2792.79	-2.25931	0.114609	-19.7132	1.66264e-86	3.92326e-85
Slc25a19	2123.15	-2.25629	0.062369	-36.1765	1.42844e-286	2.7959e-284
Ankdd1b	25.4088	-2.2539	0.498421	-4.52208	6.12354e-06	1.41093e-05
Pacrg	6.99672	-2.25274	0.749522	-3.00556	0.00265089	0.00474511
Fsd2	29.6835	-2.25183	0.461305	-4.88144	1.05316e-06	2.56681e-06
Gp1bb	28.0045	-2.24433	0.487272	-4.60591	4.10664e-06	9.59535e-06
Dna2	998.606	-2.2433	0.211085	-10.6275	2.22087e-26	1.30158e-25
Nrp1	2480.25	-2.24057	0.0949127	-23.6067	3.29266e-123	1.35862e-121
Gt(ROSA)26Sor	266.962	-2.239	0.183473	-12.2034	2.97977e-34	2.22782e-33
Glod5	8.30928	-2.23866	0.733781	-3.05085	0.00228192	0.00412138
Klhdc8b	56.9286	-2.23764	0.427564	-5.23347	1.66361e-07	4.30625e-07
Gpr128	5.52684	-2.23764	0.779871	-2.86924	0.00411461	0.00719562
Hist2h2be	374.741	-2.23726	0.220953	-10.1255	4.25786e-24	2.32492e-23
Krt80	9.51181	-2.23699	0.691297	-3.23593	0.00121246	0.00226956
Tyms-ps	4.39852	-2.23659	0.816852	-2.73806	0.00618026	0.0105671
Hmgcs1	17500.2	-2.23499	0.12946	-17.264	8.7785e-67	1.41972e-65
Ppp1r26	116.289	-2.23483	0.262281	-8.52074	1.58538e-17	6.75145e-17
Irs1	3765.16	-2.23195	0.0705246	-31.6478	8.13218e-220	9.26523e-218
Gm101	4.33659	-2.22852	0.823253	-2.70697	0.00678995	0.0115617
Pik3r3	491.306	-2.22822	0.134821	-16.5273	2.33399e-61	3.37754e-60
Prkar2b	5135.35	-2.22757	0.0786643	-28.3174	2.10748e-176	1.55434e-174
Ddhd2	2941.23	-2.22496	0.0901911	-24.6694	2.28091e-134	1.09505e-132
Adam1a	30.0328	-2.22446	0.517476	-4.29866	1.71833e-05	3.82025e-05
Agbl3	200.845	-2.22359	0.263266	-8.44617	3.01027e-17	1.26606e-16
Cebpa	10106.9	-2.22097	0.0883529	-25.1375	1.93671e-139	9.88889e-138
Ankrd37	43.4239	-2.21833	0.36939	-6.00539	1.90877e-09	5.50874e-09
Ikzf1	5.51311	-2.21808	0.797734	-2.78048	0.00542785	0.00934766
Stard7	10845.3	-2.2178	0.179682	-12.343	5.31585e-35	4.0538e-34
Dmc1	5.35433	-2.21242	0.789553	-2.80212	0.00507679	0.00877276
Pom121l2	3.30521	-2.21148	0.839594	-2.63399	0.00843884	0.014178
Coq5	3714.43	-2.2114	0.0963482	-22.9522	1.40121e-116	5.26902e-115
Ccdc149	24.949	-2.21007	0.527041	-4.19336	2.74849e-05	6.01853e-05
4930568K20Rik	16.3463	-2.20964	0.573447	-3.85326	0.000116554	0.000240725
C230035I16Rik	47.5152	-2.2081	0.462981	-4.76932	1.84853e-06	4.42691e-06
Slc34a2	42.9309	-2.20533	0.383418	-5.75177	8.83161e-09	2.46584e-08
Katnal2	127.577	-2.20515	0.251089	-8.78234	1.60109e-18	7.04232e-18
1810062G17Rik	26.4755	-2.19824	0.569807	-3.85788	0.000114376	0.000236322
Angpt1	130.01	-2.1972	0.356761	-6.15875	7.33197e-10	2.16513e-09
2810021J22Rik	199.542	-2.19612	0.309855	-7.08757	1.36486e-12	4.65328e-12
Klhl2	571.314	-2.19481	0.164573	-13.3364	1.42185e-40	1.24755e-39
Uqcrh	9627.44	-2.19211	0.138996	-15.771	4.9279e-56	6.3063e-55
Ano1	309.828	-2.19174	0.226091	-9.69409	3.19487e-22	1.62641e-21
Snord99	29.7446	-2.19003	0.437378	-5.00719	5.52316e-07	1.37165e-06
Efcab4a	34.0584	-2.18653	0.414872	-5.27036	1.36154e-07	3.55205e-07
Scarna17	29.4339	-2.18618	0.45625	-4.79162	1.65436e-06	3.97562e-06
Cbln3	4.63994	-2.18613	0.827687	-2.64125	0.00826007	0.013896
Cirbp	199.252	-2.18505	0.186284	-11.7297	8.9766e-32	6.22936e-31
Snord49b	11.5902	-2.18174	0.6788	-3.21411	0.0013085	0.00244186
Elmod2	2271.8	-2.17953	0.0749912	-29.0637	1.03182e-185	8.37914e-184
Ccdc25	936.458	-2.17707	0.13111	-16.6049	6.42556e-62	9.46901e-61
Hadhb	9253.4	-2.17616	0.0949687	-22.9145	3.3316e-116	1.24057e-114
Adam12	4359.77	-2.17465	0.130844	-16.6202	4.98019e-62	7.35324e-61
1700102H20Rik	19.5499	-2.17431	0.543308	-4.00198	6.28146e-05	0.000132732
4930452B06Rik	476.274	-2.173	0.13115	-16.5688	1.17065e-61	1.71026e-60
Fnta	1811.91	-2.17263	0.215724	-10.0713	7.39746e-24	4.00486e-23
Bmp3	25.3789	-2.17226	0.751929	-2.88892	0.00386565	0.00678823
Klhl41	7.03835	-2.17091	0.763707	-2.84259	0.0044748	0.00778806
BC021785	8.75214	-2.16962	0.709434	-3.05823	0.00222646	0.0040298
Clec2l	19.1339	-2.16952	0.654649	-3.31402	0.000919637	0.00174411
Adamts9	449.911	-2.16891	0.156212	-13.8844	7.87699e-44	7.53025e-43
Mrap	4956.5	-2.16667	0.103453	-20.9435	2.15142e-97	5.91815e-96
Efnb2	90.8626	-2.1655	0.445147	-4.86469	1.14636e-06	2.78729e-06
Tmc4	12.3572	-2.16447	0.616209	-3.51256	0.000443814	0.00087002
Stard4	1158.45	-2.16287	0.166004	-13.029	8.37079e-39	6.97962e-38
Dnajc12	63.0607	-2.16281	0.304953	-7.09227	1.31932e-12	4.50001e-12
Slbp	2604.19	-2.16275	0.173535	-12.4629	1.18996e-35	9.25479e-35
Slc4a4	10420.8	-2.16263	0.0888339	-24.3446	6.61194e-131	3.08699e-129
Enho	18.5464	-2.16233	0.584994	-3.69633	0.000218736	0.000441842
Lactb	592.659	-2.16152	0.117823	-18.3454	3.59077e-75	6.79309e-74
5930438M14Rik	11.2413	-2.16106	0.675619	-3.19864	0.00138079	0.00256954
Brca1	3226.2	-2.15904	0.0733317	-29.4421	1.58963e-190	1.37113e-188
Iigp1	14.7515	-2.15834	0.609343	-3.54208	0.000396989	0.000781942
4930594C11Rik	4.4277	-2.15816	0.82379	-2.6198	0.00879826	0.0147494
Cpt2	3850.42	-2.15797	0.152122	-14.1858	1.12184e-45	1.12604e-44
Ccdc134	635.638	-2.15727	0.161734	-13.3384	1.38352e-40	1.21462e-39
Kcnrg	4.08149	-2.15676	0.825649	-2.6122	0.00899617	0.0150514
Gnai1	93.2835	-2.15147	0.513886	-4.18666	2.83092e-05	6.19192e-05
Mir25	11.592	-2.15144	0.652186	-3.29882	0.000970927	0.00183682
Far1	3125.9	-2.15098	0.0714511	-30.1043	4.25744e-199	3.91556e-197
Hist1h2ai	208.458	-2.15006	0.211905	-10.1464	3.43891e-24	1.88178e-23
Accsl	25.2006	-2.14987	0.483699	-4.44465	8.80355e-06	2.00274e-05
Mmab	958.482	-2.14899	0.138006	-15.5717	1.13438e-54	1.39554e-53
1600016N20Rik	8.1705	-2.14457	0.746415	-2.87316	0.00406383	0.00711251
0610040B10Rik	64.8192	-2.14237	0.42698	-5.01749	5.23507e-07	1.30318e-06
Mrpl18	2953.53	-2.14029	0.11132	-19.2265	2.22261e-82	4.90356e-81
Gm5069	28.7163	-2.13926	0.501233	-4.26799	1.97245e-05	4.36109e-05
Epb4.1l4b	117.158	-2.13853	0.322067	-6.63999	3.13696e-11	1.00172e-10
Arid3a	119.087	-2.13837	0.276062	-7.74598	9.48464e-15	3.55429e-14
Pde4b	90.5087	-2.138	0.420679	-5.08227	3.7295e-07	9.37719e-07
Fdx1l	8.63947	-2.13707	0.693972	-3.07947	0.00207368	0.00376937
Aldoc	184.154	-2.13636	0.238131	-8.97138	2.92827e-19	1.32619e-18
Asb5	7.63995	-2.13172	0.745352	-2.86002	0.00423609	0.00739535
Pitx3	13.9125	-2.1317	0.687336	-3.10139	0.00192615	0.00351794
Ccdc173	34.7302	-2.1301	0.487282	-4.3714	1.23454e-05	2.77459e-05
Ccdc167	897.026	-2.12822	0.120643	-17.6406	1.2013e-69	2.0378e-68
Ccnd1	101.677	-2.12751	0.251886	-8.44632	3.00627e-17	1.26472e-16
Snhg4	155.075	-2.12544	0.233647	-9.09677	9.30582e-20	4.3e-19
Snora61	94.4549	-2.11884	0.311487	-6.80233	1.02942e-11	3.37402e-11
Car9	30.6487	-2.11695	0.453407	-4.66899	3.02691e-06	7.1502e-06
Fam83d	351.089	-2.1143	0.144373	-14.6447	1.45557e-48	1.55183e-47
9230116N13Rik	37.3691	-2.1134	0.444467	-4.7549	1.98548e-06	4.74891e-06
Lamb3	538.132	-2.11243	0.135245	-15.6192	5.38462e-55	6.69984e-54
Esr1	228.953	-2.11233	0.208357	-10.138	3.74569e-24	2.04819e-23
Slc2a4rg-ps	39.7842	-2.10816	0.508404	-4.14663	3.37408e-05	7.31084e-05
Ltbp2	426.377	-2.10752	0.148899	-14.1541	1.76204e-45	1.7548e-44
Cox7a1	2733.4	-2.10427	0.127991	-16.4407	9.77864e-61	1.39134e-59
Dhrs4	1358.98	-2.1042	0.076674	-27.4434	8.32719e-166	5.4798e-164
Ndrg2	6648.03	-2.10407	0.0632963	-33.2415	2.70516e-242	3.59128e-240
Wap	3.92837	-2.10064	0.828331	-2.53599	0.0112128	0.0185548
Fbn2	91.0485	-2.09932	0.47305	-4.43784	9.08667e-06	2.06561e-05
Aim1	76.7814	-2.09736	0.293446	-7.14734	8.84744e-13	3.04426e-12
Lat2	21.0572	-2.09694	0.504432	-4.15703	3.22412e-05	7.00279e-05
Mtx3	1612.62	-2.09488	0.108653	-19.2805	7.82806e-83	1.74469e-81
Rassf4	63.5624	-2.09364	0.301434	-6.94561	3.76823e-12	1.25913e-11
Ndufs1	23705.9	-2.08916	0.0602913	-34.6511	4.29704e-263	6.69417e-261
Ces1d	1138.69	-2.08718	0.607131	-3.43778	0.000586502	0.0011353
Impdh1	4708.26	-2.08685	0.0583606	-35.7579	4.98393e-280	9.0583e-278
Vmac	190.478	-2.08681	0.250358	-8.33531	7.72945e-17	3.17988e-16
Rdh10	326.809	-2.08672	0.177389	-11.7635	6.01547e-32	4.21083e-31
Syne2	3043.45	-2.0864	0.143554	-14.5339	7.38975e-48	7.74857e-47
Dok2	5.88719	-2.08594	0.763617	-2.73166	0.00630158	0.0107625
Slco4a1	13.0158	-2.08239	0.682592	-3.05072	0.00228297	0.00412279
Zfp300	9.50633	-2.08187	0.697371	-2.98531	0.00283288	0.00505843
Arpp19	3250.87	-2.07802	0.0808224	-25.7109	8.8266e-146	4.88245e-144
Igflr1	58.1731	-2.0779	0.349149	-5.95132	2.65987e-09	7.61309e-09
Dqx1	18.2115	-2.0768	0.607285	-3.41981	0.000626648	0.00120903
Mc2r	289.246	-2.07528	0.155049	-13.3847	7.42861e-41	6.57846e-40
Arc	230.016	-2.07525	0.408956	-5.0745	3.88515e-07	9.75569e-07
Gyk	4033.51	-2.07112	0.128886	-16.0695	4.17659e-58	5.5592e-57
Scarna6	1599.52	-2.07033	0.21803	-9.49561	2.18921e-21	1.08234e-20
Acp5	51.2194	-2.07011	0.43606	-4.74731	2.06139e-06	4.92432e-06
Npr1	445.892	-2.06971	0.142748	-14.499	1.22909e-47	1.28086e-46
Snora34	21.312	-2.06774	0.530642	-3.89668	9.75213e-05	0.000202428
Lix1	15.9377	-2.06675	0.574665	-3.59644	0.000322606	0.000640721
4921531C22Rik	80.11	-2.06433	0.275711	-7.48727	7.03191e-14	2.52973e-13
Cox17	1899.29	-2.0637	0.166977	-12.3592	4.34303e-35	3.32023e-34
Cdk6	44.1343	-2.06222	0.4065	-5.07312	3.9135e-07	9.82526e-07
Aqp3	25.1609	-2.06178	0.509703	-4.04507	5.23086e-05	0.000111447
A630072M18Rik	53.2682	-2.06091	0.326989	-6.30268	2.92535e-10	8.86314e-10
Derl3	18.4285	-2.06072	0.544337	-3.78575	0.000153243	0.000314246
Mirlet7a-1	5.61084	-2.06072	0.814035	-2.53149	0.0113579	0.0187683
Cib4	6.34745	-2.05823	0.791464	-2.60054	0.00930775	0.015537
Meox1	3.898	-2.05802	0.825058	-2.49439	0.0126173	0.0207127
Timm21	869.321	-2.05749	0.160388	-12.8282	1.13934e-37	9.23753e-37
Tmem56	558.616	-2.05729	0.136957	-15.0215	5.31067e-51	6.02363e-50
Tmem186	828.895	-2.05719	0.114823	-17.9162	8.81595e-72	1.55599e-70
Jarid2	3344.76	-2.05712	0.064199	-32.0429	2.75941e-225	3.34349e-223
Map3k15	163.593	-2.05691	0.210939	-9.75117	1.82353e-22	9.37368e-22
Ankrd35	6.12346	-2.04826	0.76476	-2.67831	0.00739958	0.0125354
Pisd-ps1	41.0594	-2.04256	0.394401	-5.17888	2.23224e-07	5.72477e-07
1810033B17Rik	17.0192	-2.04018	0.651539	-3.13133	0.00174019	0.00319628
Mal2	21.8072	-2.03948	0.546869	-3.72937	0.000191963	0.000389772
Atg4a	3.98278	-2.0387	0.827212	-2.46454	0.0137188	0.0223646
Cep55	520.005	-2.03741	0.127112	-16.0285	8.08072e-58	1.06536e-56
Kbtbd3	110.789	-2.03551	0.252602	-8.05815	7.74589e-16	3.04314e-15
Cyth1	1583.7	-2.03534	0.0863572	-23.5689	8.03706e-123	3.29844e-121
Gm10560	17.3036	-2.03115	0.622091	-3.26504	0.00109447	0.00205982
Tmem139	10.0207	-2.03064	0.638932	-3.17818	0.00148203	0.0027459
Stat1	11433.8	-2.02973	0.0583769	-34.7694	7.06845e-265	1.13594e-262
Nuggc	6.76779	-2.02857	0.736919	-2.75277	0.00590926	0.0101353
Ebf2	2836.61	-2.02813	0.0654277	-30.9981	5.72167e-211	6.10858e-209
Mroh8	5.55488	-2.02556	0.749549	-2.70237	0.00688475	0.0117087
Ctr9	5576.73	-2.02542	0.0482048	-42.017	0	0
Cnnm2	1912.29	-2.02491	0.0809517	-25.0138	4.32748e-138	2.17328e-136
Pbk	1696.93	-2.02303	0.107559	-18.8085	6.4328e-79	1.31121e-77
Pif1	127.324	-2.02025	0.235558	-8.57644	9.78589e-18	4.19431e-17
Dffb	130.389	-2.01752	0.228319	-8.83642	9.88356e-19	4.38258e-18
Bmper	618.261	-2.01713	0.121079	-16.6596	2.57873e-62	3.83344e-61
Rgag1	32.3534	-2.01531	0.435445	-4.62816	3.68934e-06	8.66008e-06
Ccdc137	365.039	-2.01476	0.179525	-11.2228	3.15228e-29	2.01955e-28
Sccpdh	2796.12	-2.01282	0.121683	-16.5415	1.84526e-61	2.68045e-60
BC002163	316.487	-2.01106	0.222676	-9.03132	1.69619e-19	7.76485e-19
Clpx	4731.43	-2.01102	0.142317	-14.1305	2.46246e-45	2.44278e-44
Gm4285	114.99	-2.01095	0.27177	-7.39944	1.36759e-13	4.85334e-13
Snord82	3.71893	-2.01067	0.826091	-2.43396	0.0149347	0.0242433
Pspc1	1349.7	-2.0095	0.110761	-18.1426	1.46919e-73	2.68625e-72
Slc30a5	3807.25	-2.00547	0.0667115	-30.0619	1.52633e-198	1.38705e-196
Rasd1	38.0654	-2.00523	0.436378	-4.59516	4.32413e-06	1.00835e-05
Dolk	2177.29	-2.00411	0.153823	-13.0287	8.40249e-39	7.00223e-38
C330013E15Rik	12.2152	-2.00386	0.621549	-3.22397	0.00126425	0.00236304
Ccar1	2157.39	-2.00183	0.0928829	-21.5522	5.04611e-103	1.50174e-101
Phtf2	489.07	-2.00143	0.198341	-10.0908	6.06552e-24	3.30016e-23
Pdss1	1202.24	-2.00048	0.145279	-13.7699	3.86677e-43	3.61286e-42

## Sheet: Sheet2
KEGG pathway analysis results of DEGs down-regulated in LF3-treated Wnt+ adipocytes.
ID	Description	GeneRatio	BgRatio	pvalue	p.adjust	qvalue	geneID	Count
mmu04714	Thermogenesis	19/214	232/8370	6.95e-06	0.000365755	0.000281068	22227/12895/11556/11958/14081/333182/83379/23945/54405/68342/12869/12864/407790/66576/12896/12865/227197/18160/12856	19
mmu04151	PI3K-Akt signaling pathway	18/214	358/8370	0.00463821	0.038228	0.0293767	18534/12447/232493/14173/14710/12448/22027/18708/17863/16000/67168/16367/18710/11600/12189/12443/16780/12571	18
mmu04932	Non-alcoholic fatty liver disease (NAFLD)	14/214	151/8370	2.99e-05	0.000982142	0.000754738	11450/333182/54405/18708/68342/12869/12864/407790/16367/18710/12606/66576/12865/227197	14
mmu04152	AMPK signaling pathway	13/214	126/8370	1.85e-05	0.000695895	0.000534768	18534/12895/11450/18639/232493/18641/16369/14104/18708/16000/16367/18710/12443	13
mmu04923	Regulation of lipolysis in adipocytes	12/214	56/8370	1.19e-08	3.13e-06	2.4e-06	11556/23945/18576/16369/11770/22095/11539/18708/16367/18710/14677/18160	12
mmu01200	Carbon metabolism	12/214	120/8370	5.33e-05	0.00140078	0.00107645	353204/71832/18641/14380/11364/110460/74147/110446/17449/15926/20916/11676	12
mmu00190	Oxidative phosphorylation	12/214	134/8370	0.00015551	0.00371809	0.00285721	11958/333182/54405/68342/68775/12869/12864/407790/66576/12865/227197/12856	12
mmu04934	Cushing syndrome	12/214	159/8370	0.000751318	0.014114	0.0108461	12447/22418/12580/12448/242705/18795/77037/14677/12443/17200/12571/19416	12
mmu03320	PPAR signaling pathway	11/214	85/8370	9.58e-06	0.000419766	0.000322574	18534/22227/12895/11450/14081/14626/11364/11770/13167/74147/12896	11
mmu04910	Insulin signaling pathway	11/214	140/8370	0.000891326	0.0156279	0.0120094	18534/53412/232493/228966/18576/16369/14104/18708/16367/18710/19088	11
mmu01212	Fatty acid metabolism	10/214	57/8370	1.46e-06	9.61e-05	7.39e-05	12895/14081/11364/110460/74147/12686/14104/110446/231086/12896	10
mmu04931	Insulin resistance	10/214	110/8370	0.000488086	0.0106972	0.0082204	18534/12895/53412/232493/228966/170826/26568/18708/16367/18710	10
mmu05012	Parkinson disease	10/214	144/8370	0.00376797	0.035392	0.0271974	333182/54405/68342/12869/12864/407790/66576/14677/12865/227197	10
mmu05224	Breast cancer	10/214	147/8370	0.00436381	0.038228	0.0293767	14173/22418/242705/18708/16000/18710/12189/12443/13982/12571	10
mmu04611	Platelet activation	9/214	125/8370	0.00465132	0.038228	0.0293767	18436/14723/18708/211429/18795/18441/14724/18710/14677	9
mmu00640	Propanoate metabolism	8/214	31/8370	7.62e-07	9.61e-05	7.39e-05	11364/110460/74147/380660/110446/52665/16828/20916	8
mmu00071	Fatty acid degradation	8/214	50/8370	3.41e-05	0.000997151	0.000766271	12895/14081/11364/110460/74147/110446/231086/12896	8
mmu04146	Peroxisome	8/214	84/8370	0.0013174	0.0192487	0.0147919	76263/14081/26874/74147/19301/15926/67420/28200	8
mmu05222	Small cell lung cancer	8/214	92/8370	0.00236369	0.0270282	0.0207702	12447/12448/242705/18708/18710/12443/16780/12571	8
mmu05215	Prostate cancer	8/214	97/8370	0.00329253	0.0333052	0.0255937	12447/12448/22027/242705/18708/16000/18710/12443	8
mmu04922	Glucagon signaling pathway	8/214	102/8370	0.00448303	0.038228	0.0293767	18534/12895/18639/232493/18641/18576/18795/16828	8
mmu04066	HIF-1 signaling pathway	8/214	105/8370	0.00534153	0.0425704	0.0327137	228026/112407/18641/18708/16000/16828/18710/11600	8
mmu00900	Terpenoid backbone biosynthesis	7/214	23/8370	1.12e-06	9.61e-05	7.39e-05	110460/66881/110446/192156/208715/14272/56075	7
mmu05230	Central carbon metabolism in cancer	7/214	64/8370	0.00116757	0.0184941	0.014212	228026/18641/14380/18708/16828/80879/18710	7
mmu04115	p53 signaling pathway	7/214	71/8370	0.0021502	0.0270282	0.0207702	12447/16009/12448/16000/20135/12443/12571	7
mmu05218	Melanoma	7/214	72/8370	0.00233116	0.0270282	0.0207702	14173/242705/18708/16000/18710/12443/12571	7
mmu04260	Cardiac muscle contraction	7/214	78/8370	0.00367595	0.035392	0.0271974	333182/319734/12869/12864/12298/66576/12865	7
mmu00280	Valine, leucine and isoleucine degradation	6/214	56/8370	0.00291234	0.0306378	0.023544	11364/110460/74147/110446/208715/231086	6
mmu00650	Butanoate metabolism	5/214	27/8370	0.000531673	0.0107562	0.00826569	20216/110460/74147/110446/208715	5
mmu00020	Citrate cycle (TCA cycle)	5/214	32/8370	0.00119544	0.0184941	0.014212	18534/71832/17449/15926/20916	5
mmu00620	Pyruvate metabolism	5/214	38/8370	0.00263173	0.0288393	0.0221619	18534/110460/110446/17449/16828	5
mmu04964	Proximal tubule bicarbonate reclamation	4/214	22/8370	0.00211599	0.0270282	0.0207702	18534/12349/17449/54403	4
mmu00072	Synthesis and degradation of ketone bodies	3/214	11/8370	0.00233632	0.0270282	0.0207702	110460/110446/208715	3
